# Supplementary material for: A radiomics-based comparative study on arterial spin labeling and dynamic susceptibility contrast perfusion-weighted imaging in gliomas
Source: PubMed Central journal article supplement (PMC7145821; doi:10.1038/s41598-020-62658-9), 2020-04-09
Supplement: 41598_2020_62658_MOESM1_ESM.pdf [file 41598_2020_62658_MOESM1_ESM.pdf]

**A radiomics-based comparative study on arterial spin labeling and dynamic susceptibility contrast perfusion-weighted imaging in gliomas**

**Authors and affiliations**

Takashi Hashido<sup>1,2</sup>, Shigeyoshi Saito<sup>2</sup>, Takayuki Ishida<sup>2,\*</sup>

<sup>1</sup> Department of Medical Technology, Osaka University Hospital, Suita, Osaka, Japan

<sup>2</sup> Department of Medical Physics and Engineering, Division of Health Science, Osaka University Graduate School of Medicine, Suita, Osaka, Japan

**\*Corresponding author information**

Takayuki Ishida, PhD

Department of Medical Physics and Engineering, Division of Health Science, Osaka

University Graduate School of Medicine

1-7 Yamadaoka, Suita, Osaka 565-0871, Japan

E-mail address: tishida@sahs.med.osaka-u.ac.jp

**Supplementary file contents:**

**Supplementary Table S1**

Radiomic features included in this study. All radiomic features extracted by using PyRadiomics (<http://www.radiomics.io/pyradiomics.html>).

**Supplementary Table S2**

Comparisons of all radiomic features between ASL-nCBF and DSC-nrCBF in gliomas.

**Supplementary Table S3**

Correlation coefficients of all radiomic features between ASL-nCBF and DSC-nrCBF in gliomas.

**Supplementary Text S1**

The scan parameters of the anatomical MR imaging ( $T_1$  FLAIR,  $T_2$  FLAIR,  $T_2$ WI,  $T_2^*$ WI, and CE- $T_1$ WI) and MR perfusion-weighted imaging (ASL and DSC imaging).

**Supplementary Table S1.** Radiomic features included in this study.

| Feature # | Radiomic feature               | Feature # | Radiomic feature    | Feature # | Radiomic feature                     |
|-----------|--------------------------------|-----------|---------------------|-----------|--------------------------------------|
|           | <b>First-order statistics</b>  | 32        | Autocorrelation     | 63        | Run-length non-uniformity            |
| 1         | Interquartile range            | 33        | Sum entropy         | 64        | Short run emphasis                   |
| 2         | Skewness                       | 34        | Sum squares         | 65        | Long run high gray-level emphasis    |
| 3         | Uniformity                     | 35        | Cluster prominence  | 66        | Run percentage                       |
| 4         | Median                         | 36        | Imc2                | 67        | Long run low gray-level emphasis     |
| 5         | Energy                         | 37        | Imc1                | 68        | Run entropy                          |
| 6         | Robust mean absolute deviation | 38        | Difference average  | 69        | High gray-level run emphasis         |
| 7         | Mean absolute deviation        | 39        | Id                  | 70        | Run-length non-uniformity normalized |
| 8         | Total energy                   | 40        | Cluster tendency    |           | <b>GLSZM</b>                         |
| 9         | Maximum                        |           | <b>GLDM</b>         | 71        | Gray-level variance                  |
| 10        | Root mean squared              | 41        | Gray-level variance | 72        | Zone variance                        |

|    |                             |    |                                              |    |                                         |
|----|-----------------------------|----|----------------------------------------------|----|-----------------------------------------|
| 11 | 90 <sup>th</sup> percentile | 42 | High gray-level emphasis                     | 73 | Gray-level non-uniformity<br>normalized |
| 12 | Minimum                     | 43 | Dependence entropy                           | 74 | Size-zone non-uniformity<br>normalized  |
| 13 | Entropy                     | 44 | Dependence non-uniformity                    | 75 | Size-zone non-uniformity                |
| 14 | Range                       | 45 | Gray-level non-uniformity                    | 76 | Gray-level non-uniformity               |
| 15 | Variance                    | 46 | Small dependence emphasis                    | 77 | Large area emphasis                     |
| 16 | 10 <sup>th</sup> percentile | 47 | Small dependence high<br>gray-level emphasis | 78 | Small area high gray-level<br>emphasis  |
| 17 | Kurtosis                    | 48 | Dependence non-uniformity<br>normalized      | 79 | Zone percentage                         |
| 18 | Mean                        | 49 | Large dependence emphasis                    | 80 | Large area low gray-level<br>emphasis   |
|    | <b>GLCM</b>                 | 50 | Large dependence low<br>gray-level emphasis  | 81 | Large area high gray-level<br>emphasis  |
| 19 | Joint average               | 51 | Dependence variance                          | 82 | High gray-level zone<br>emphasis        |

|    |                     |    |                                              |    |                                       |
|----|---------------------|----|----------------------------------------------|----|---------------------------------------|
| 20 | Joint entropy       | 52 | Large dependence high<br>gray-level emphasis | 83 | Small area emphasis                   |
| 21 | Cluster shade       | 53 | Small dependence low<br>gray-level emphasis  | 84 | Low gray-level zone<br>emphasis       |
| 22 | Maximum probability | 54 | Low gray-level emphasis                      | 85 | Zone entropy                          |
| 23 | Idmn                |    | <b>GLRLM</b>                                 | 86 | Small area low gray-level<br>emphasis |
| 24 | Joint energy        | 55 | Short run low gray-level emphasis            |    | <b>NGTDM</b>                          |
| 25 | Contrast            | 56 | Gray-level variance                          | 87 | Coarseness                            |
| 26 | Difference entropy  | 57 | Low gray-level run emphasis                  | 88 | Complexity                            |
| 27 | Inverse variance    | 58 | Gray-level non-uniformity<br>normalized      | 89 | Strength                              |
| 28 | Difference variance | 59 | Run variance                                 | 90 | Contrast                              |
| 29 | Idn                 | 60 | Gray-level non-uniformity                    | 91 | Busyness                              |
| 30 | Idm                 | 61 | Long run emphasis                            |    |                                       |
| 31 | Correlation         | 62 | Short run high gray-level emphasis           |    |                                       |

---

GLCM, gray-level co-occurrence matrix; GLDM, gray-level dependence matrix; GLRLM, gray-level run-length matrix; GLSZM, gray-level size-zone matrix; NGTDM, neighboring gray-tone difference matrix.

**Supplementary Table S2.** Comparisons of radiomic features between ASL-nCBF and DSC-nrCBF in gliomas.

| Feature #                     | Radiomic feature                      | ASL-nCBF                                    | DSC-nrCBF                                    | P-value   |
|-------------------------------|---------------------------------------|---------------------------------------------|----------------------------------------------|-----------|
| <b>First-order statistics</b> |                                       |                                             |                                              |           |
| 1                             | <i>Interquartile range</i>            | 1.10 ± 0.77                                 | 2.17 ± 1.95                                  | <0.00001* |
| 2                             | <i>Skewness</i>                       | 0.73 ± 0.67                                 | 2.23 ± 1.48                                  | <0.00001* |
| 3                             | <i>Uniformity</i>                     | 0.03 ± 0.02                                 | 0.10 ± 0.06                                  | <0.00001* |
| 4                             | Median                                | 1.91 ± 0.79                                 | 2.53 ± 1.96                                  | 0.05534   |
| 5                             | <i>Energy</i>                         | 6.68×10 <sup>5</sup> ± 9.39×10 <sup>5</sup> | 3.14×10 <sup>6</sup> ± 7.64×10 <sup>6</sup>  | 0.00003*  |
| 6                             | <i>Robust mean absolute deviation</i> | 0.46 ± 0.32                                 | 0.95 ± 0.86                                  | <0.00001* |
| 7                             | <i>Mean absolute deviation</i>        | 0.64 ± 0.42                                 | 1.51 ± 1.36                                  | <0.00001* |
| 8                             | <i>Total energy</i>                   | 1.32×10 <sup>5</sup> ± 1.86×10 <sup>5</sup> | 6.20×10 <sup>5</sup> ± 15.11×10 <sup>5</sup> | 0.00003*  |
| 9                             | <i>Maximum</i>                        | 5.30 ± 2.83                                 | 24.41 ± 21.77                                | <0.00001* |
| 10                            | <i>Root mean squared</i>              | 2.21 ± 0.96                                 | 3.76 ± 2.94                                  | <0.00001* |
| 11                            | <i>90<sup>th</sup> percentile</i>     | 3.15 ± 1.51                                 | 5.64 ± 4.75                                  | <0.00001* |
| 12                            | <i>Minimum</i>                        | 0.49 ± 0.31                                 | 0.13 ± 0.26                                  | <0.00001* |
| 13                            | <i>Entropy</i>                        | 5.50 ± 0.90                                 | 3.94 ± 1.02                                  | <0.00001* |
| 14                            | <i>Range</i>                          | 4.81 ± 2.95                                 | 24.29 ± 21.80                                | <0.00001* |

|             |                             |                                              |                                             |           |
|-------------|-----------------------------|----------------------------------------------|---------------------------------------------|-----------|
| 15          | <i>Variance</i>             | 0.90 ± 1.08                                  | 7.76 ± 14.79                                | <0.00001* |
| 16          | 10 <sup>th</sup> percentile | 1.14 ± 0.40                                  | 1.11 ± 1.01                                 | 0.10877   |
| 17          | <i>Kurtosis</i>             | 3.85 ± 2.31                                  | 14.86 ± 16.69                               | <0.00001* |
| 18          | Mean                        | 2.05 ± 0.85                                  | 3.06 ± 2.37                                 | 0.00552   |
| <b>GLCM</b> |                             |                                              |                                             |           |
| 19          | <i>Joint average</i>        | 32.36 ± 17.79                                | 9.98 ± 7.47                                 | <0.00001* |
| 20          | <i>Joint entropy</i>        | 8.45 ± 1.55                                  | 6.21 ± 1.85                                 | <0.00001* |
| 21          | <i>Cluster shade</i>        | 6.44×10 <sup>4</sup> ± 12.61×10 <sup>4</sup> | 1.98×10 <sup>4</sup> ± 6.48×10 <sup>4</sup> | 0.00027*  |
| 22          | <i>Maximum probability</i>  | 0.03 ± 0.02                                  | 0.10 ± 0.09                                 | <0.00001* |
| 23          | Idmn                        | 0.999 ± 0.001                                | 0.999 ± 0.001                               | 0.72908   |
| 24          | <i>Joint energy</i>         | 0.008 ± 0.008                                | 0.046 ± 0.045                               | <0.00001* |
| 25          | Contrast                    | 11.47 ± 18.93                                | 7.32 ± 15.62                                | 0.00097   |
| 26          | <i>Difference entropy</i>   | 2.42 ± 0.63                                  | 1.91 ± 0.72                                 | <0.00001* |
| 27          | Inverse variance            | 0.38 ± 0.07                                  | 0.38 ± 0.07                                 | 0.93102   |
| 28          | Difference variance         | 6.11 ± 12.31                                 | 4.47 ± 10.09                                | 0.08433   |
| 29          | Idn                         | 0.98 ± 0.01                                  | 0.98 ± 0.01                                 | 0.00329   |
| 30          | <i>Idm</i>                  | 0.46 ± 0.12                                  | 0.62 ± 0.16                                 | <0.00001* |
| 31          | <i>Correlation</i>          | 0.98 ± 0.01                                  | 0.94 ± 0.03                                 | <0.00001* |

|             |                                  |                                             |                                              |           |
|-------------|----------------------------------|---------------------------------------------|----------------------------------------------|-----------|
| 32          | <i>Autocorrelation</i>           | 1713.07 ± 1899.91                           | 225.61 ± 358.59                              | <0.00001* |
| 33          | <i>Sum entropy</i>               | 6.52 ± 0.93                                 | 4.85 ± 1.10                                  | <0.00001* |
| 34          | <i>Sum squares</i>               | 361.79 ± 438.46                             | 75.08 ± 145.66                               | <0.00001* |
| 35          | <i>Cluster prominence</i>        | 1.71×10 <sup>7</sup> ± 3.37×10 <sup>7</sup> | 3.88×10 <sup>6</sup> ± 17.01×10 <sup>6</sup> | <0.00001* |
| 36          | <i>Imc2</i>                      | 0.995 ± 0.003                               | 0.975 ± 0.015                                | <0.00001* |
| 37          | <i>Imc1</i>                      | -0.47 ± 0.04                                | -0.43 ± 0.06                                 | <0.00001* |
| 38          | <i>Difference average</i>        | 1.96 ± 1.11                                 | 1.25 ± 1.09                                  | <0.00001* |
| 39          | <i>Id</i>                        | 0.52 ± 0.10                                 | 0.65 ± 0.14                                  | <0.00001* |
| 40          | <i>Cluster tendency</i>          | 1435.70 ± 1740.02                           | 293.02 ± 568.12                              | <0.00001* |
| <b>GLDM</b> |                                  |                                             |                                              |           |
| 41          | <i>Gray-level variance</i>       | 361.06 ± 434.61                             | 75.80 ± 144.24                               | <0.00001* |
| 42          | <i>High gray-level emphasis</i>  | 1687.60 ± 1845.51                           | 226.83 ± 359.59                              | <0.00001* |
| 43          | <i>Dependence entropy</i>        | 8.87 ± 0.61                                 | 7.83 ± 0.69                                  | <0.00001* |
| 44          | <i>Dependence non-uniformity</i> | 1.12×10 <sup>4</sup> ± 1.08×10 <sup>4</sup> | 7.84×10 <sup>3</sup> ± 9.43×10 <sup>3</sup>  | <0.00001* |
| 45          | <i>Gray-level non-uniformity</i> | 3.48×10 <sup>3</sup> ± 4.63×10 <sup>3</sup> | 1.19×10 <sup>4</sup> ± 1.67×10 <sup>4</sup>  | <0.00001* |



|    |                                                  |                                         |                                         |           |
|----|--------------------------------------------------|-----------------------------------------|-----------------------------------------|-----------|
| 46 | <i>Small dependence emphasis</i>                 | $0.10 \pm 0.08$                         | $0.06 \pm 0.07$                         | <0.00001* |
| 47 | <i>Small dependence high gray-level emphasis</i> | $406.45 \pm 670.45$                     | $74.13 \pm 171.40$                      | <0.00001* |
| 48 | <i>Dependence non-uniformity normalized</i>      | $0.10 \pm 0.03$                         | $0.07 \pm 0.03$                         | <0.00001* |
| 49 | <i>Large dependence emphasis</i>                 | $67.83 \pm 41.89$                       | $167.08 \pm 105.55$                     | <0.00001* |
| 50 | <i>Large dependence low gray-level emphasis</i>  | $0.85 \pm 1.66$                         | $28.71 \pm 44.12$                       | <0.00001* |
| 51 | <i>Dependence variance</i>                       | $15.98 \pm 7.28$                        | $30.66 \pm 14.71$                       | <0.00001* |
| 52 | <i>Large dependence high gray-level emphasis</i> | $4.37 \times 10^4 \pm 2.51 \times 10^4$ | $6.80 \times 10^3 \pm 4.90 \times 10^3$ | <0.00001* |
| 53 | <i>Small dependence low gray-level emphasis</i>  | $0.0002 \pm 0.0002$                     | $0.0014 \pm 0.0011$                     | <0.00001* |
| 54 | <i>Low gray-level emphasis</i>                   | $0.006 \pm 0.008$                       | $0.089 \pm 0.090$                       | <0.00001* |

**GLRLM**

|    |                                             |                                         |                                         |           |
|----|---------------------------------------------|-----------------------------------------|-----------------------------------------|-----------|
| 55 | <i>Short run low gray-level emphasis</i>    | $0.004 \pm 0.005$                       | $0.037 \pm 0.028$                       | <0.00001* |
| 56 | <i>Gray-level variance</i>                  | $366.51 \pm 438.02$                     | $84.00 \pm 151.24$                      | <0.00001* |
| 57 | <i>Low gray-level run emphasis</i>          | $0.006 \pm 0.007$                       | $0.071 \pm 0.063$                       | <0.00001* |
| 58 | <i>Gray-level non-uniformity normalized</i> | $0.030 \pm 0.018$                       | $0.085 \pm 0.046$                       | <0.00001* |
| 59 | <i>Run variance</i>                         | $0.78 \pm 0.56$                         | $2.74 \pm 3.37$                         | <0.00001* |
| 60 | <i>Gray-level non-uniformity</i>            | $2.29 \times 10^3 \pm 2.57 \times 10^3$ | $4.70 \times 10^3 \pm 4.78 \times 10^3$ | <0.00001* |
| 61 | <i>Long run emphasis</i>                    | $2.58 \pm 1.10$                         | $6.27 \pm 5.73$                         | <0.00001* |
| 62 | <i>Short run high gray-level emphasis</i>   | $1633.12 \pm 1825.10$                   | $234.99 \pm 372.38$                     | <0.00001* |
| 63 | <i>Run-length non-uniformity</i>            | $6.48 \times 10^4 \pm 6.19 \times 10^4$ | $3.85 \times 10^4 \pm 4.90 \times 10^4$ | <0.00001* |
| 64 | <i>Short run emphasis</i>                   | $0.85 \pm 0.07$                         | $0.72 \pm 0.13$                         | <0.00001* |

|    |                                |                                             |                                             |           |
|----|--------------------------------|---------------------------------------------|---------------------------------------------|-----------|
| 65 | <i>Long run high</i>           | 2844.38 ± 2401.29                           | 432.40 ± 457.83                             | <0.00001* |
|    | <i>gray-level emphasis</i>     |                                             |                                             |           |
| 66 | <i>Run percentage</i>          | 0.78 ± 0.09                                 | 0.62 ± 0.16                                 | <0.00001* |
| 67 | <i>Long run low gray-level</i> | 0.02 ± 0.05                                 | 1.28 ± 3.47                                 | <0.00001* |
|    | <i>emphasis</i>                |                                             |                                             |           |
| 68 | <i>Run entropy</i>             | 6.45 ± 0.63                                 | 5.60 ± 0.48                                 | <0.00001* |
| 69 | <i>High gray-level run</i>     | 1762.47 ± 1901.62                           | 254.54 ± 386.05                             | <0.00001* |
|    | <i>emphasis</i>                |                                             |                                             |           |
| 70 | <i>Run-length</i>              | 0.70 ± 0.11                                 | 0.52 ± 0.18                                 | <0.00001* |
|    | <i>non-uniformity</i>          |                                             |                                             |           |
|    | <i>normalized</i>              |                                             |                                             |           |
|    | <b>GLSZM</b>                   |                                             |                                             |           |
| 71 | <i>Gray-level variance</i>     | 406.94 ± 463.55                             | 164.94 ± 216.52                             | <0.00001* |
| 72 | <i>Zone variance</i>           | 2.56×10 <sup>5</sup> ± 9.27×10 <sup>5</sup> | 1.09×10 <sup>6</sup> ± 2.21×10 <sup>6</sup> | <0.00001* |
| 73 | <i>Gray-level</i>              | 0.030 ± 0.022                               | 0.040 ± 0.022                               | 0.00071   |
|    | <i>non-uniformity</i>          |                                             |                                             |           |
|    | <i>normalized</i>              |                                             |                                             |           |

|    |                                                |                                          |                                          |           |
|----|------------------------------------------------|------------------------------------------|------------------------------------------|-----------|
| 74 | Size-zone<br>non-uniformity<br>normalized      | $0.21 \pm 0.10$                          | $0.21 \pm 0.10$                          | 0.62609   |
| 75 | Size-zone<br>non-uniformity                    | $3.03 \times 10^3 \pm 5.49 \times 10^3$  | $2.80 \times 10^3 \pm 7.80 \times 10^3$  | 0.01895   |
| 76 | Gray-level<br>non-uniformity                   | $148.43 \pm 149.26$                      | $146.66 \pm 284.66$                      | 0.03409   |
| 77 | <i>Large area emphasis</i>                     | $2.63 \times 10^5 \pm 9.44 \times 10^5$  | $1.11 \times 10^6 \pm 2.22 \times 10^6$  | <0.00001* |
| 78 | <i>Small area high<br/>gray-level emphasis</i> | $1475.35 \pm 1808.91$                    | $402.97 \pm 539.05$                      | <0.00001* |
| 79 | <i>Zone percentage</i>                         | $0.093 \pm 0.094$                        | $0.055 \pm 0.079$                        | 0.00009*  |
| 80 | <i>Large area low<br/>gray-level emphasis</i>  | $5.16 \times 10^3 \pm 30.44 \times 10^3$ | $2.88 \times 10^5 \pm 12.59 \times 10^5$ | <0.00001* |
| 81 | Large area high<br>gray-level emphasis         | $6.24 \times 10^7 \pm 18.48 \times 10^7$ | $1.65 \times 10^7 \pm 2.84 \times 10^7$  | 0.01781   |
| 82 | <i>High gray-level zone<br/>emphasis</i>       | $2540.97 \pm 2599.68$                    | $616.43 \pm 702.17$                      | <0.00001* |
| 83 | Small area emphasis                            | $0.44 \pm 0.13$                          | $0.44 \pm 0.15$                          | 0.96862   |

|              |                                           |                                             |                                              |           |
|--------------|-------------------------------------------|---------------------------------------------|----------------------------------------------|-----------|
| 84           | <i>Low gray-level zone emphasis</i>       | 0.008 ± 0.015                               | 0.054 ± 0.054                                | <0.00001* |
| 85           | <i>Zone entropy</i>                       | 8.35 ± 0.97                                 | 7.69 ± 0.93                                  | <0.00001* |
| 86           | <i>Small area low gray-level emphasis</i> | 0.002 ± 0.004                               | 0.016 ± 0.018                                | <0.00001* |
| <b>NGTDM</b> |                                           |                                             |                                              |           |
| 87           | <i>Coarseness</i>                         | 0.0021 ± 0.0036                             | 0.0011 ± 0.0019                              | <0.00001* |
| 88           | Complexity                                | 4.99×10 <sup>3</sup> ± 8.05×10 <sup>3</sup> | 5.41×10 <sup>3</sup> ± 16.02×10 <sup>3</sup> | 0.19550   |
| 89           | Strength                                  | 10.61 ± 17.07                               | 6.02 ± 11.97                                 | 0.12697   |
| 90           | <i>Contrast</i>                           | 0.038 ± 0.030                               | 0.012 ± 0.011                                | <0.00001* |
| 91           | <i>Busyness</i>                           | 1.19 ± 2.65                                 | 9.63 ± 14.72                                 | <0.00001* |

All values are expressed as the mean ± standard deviation.

\*The *italicized radiomic features* had significant differences (paired *t*-test or Wilcoxon signed-rank test,  $P < 0.00055$ : Bonferroni correction,  $\alpha = 0.05/91$ ) between ASL-nCBF and DSC-nrCBF.

ASL-nCBF, arterial spin labeling normalized cerebral blood flow; DSC-nrCBF, dynamic susceptibility contrast normalized relative cerebral blood flow; GLCM, gray-level co-occurrence matrix; GLDM, gray-level dependence matrix; GLRLM, gray-level run-length matrix; GLSZM, gray-level size-zone matrix; NGTDM, neighboring gray-tone difference matrix.

**Supplementary Table S3.** Correlation coefficients of radiomic features between ASL-nCBF and DSC-nrCBF.

| Feature # | Radiomic feature                                  | Correlation coefficient | P-value   |
|-----------|---------------------------------------------------|-------------------------|-----------|
| 44        | <i>GLDM Dependence non-uniformity</i>             | $\rho = 0.97$           | <0.00001* |
| 87        | <i>NGTDM Coarseness</i>                           | $\rho = 0.97$           | <0.00001* |
| 60        | <i>GLRLM Gray-level non-uniformity</i>            | $\rho = 0.95$           | <0.00001* |
| 45        | <i>GLDM Gray-level non-uniformity</i>             | $\rho = 0.93$           | <0.00001* |
| 63        | <i>GLRLM Run-length non-uniformity</i>            | $\rho = 0.91$           | <0.00001* |
| 5         | <i>First-order Energy</i>                         | $\rho = 0.87$           | <0.00001* |
| 8         | <i>First-order Total energy</i>                   | $\rho = 0.87$           | <0.00001* |
| 76        | <i>GLSZM Gray-level non-uniformity</i>            | $\rho = 0.82$           | <0.00001* |
| 13        | <i>First-order Entropy</i>                        | $\rho = 0.82$           | <0.00001* |
| 20        | <i>GLCM Joint entropy</i>                         | $\rho = 0.81$           | <0.00001* |
| 58        | <i>GLRLM Gray-level non-uniformity normalized</i> | $\rho = 0.81$           | <0.00001* |
| 3         | <i>First-order Uniformity</i>                     | $\rho = 0.80$           | <0.00001* |
| 72        | <i>GLSZM Zone variance</i>                        | $\rho = 0.80$           | <0.00001* |
| 77        | <i>GLSZM Large area emphasis</i>                  | $\rho = 0.79$           | <0.00001* |
| 1         | <i>First-order Interquartile range</i>            | $\rho = 0.79$           | <0.00001* |
| 85        | <i>GLSZM Zone entropy</i>                         | $\rho = 0.79$           | <0.00001* |

|    |                                                   |               |           |
|----|---------------------------------------------------|---------------|-----------|
| 24 | <i>GLCM Joint energy</i>                          | $\rho = 0.78$ | <0.00001* |
| 6  | <i>First-order Robust mean absolute deviation</i> | $\rho = 0.78$ | <0.00001* |
| 80 | <i>GLSZM Large area low gray-level emphasis</i>   | $\rho = 0.78$ | <0.00001* |
| 7  | <i>First-order Mean absolute deviation</i>        | $\rho = 0.77$ | <0.00001* |
| 91 | <i>NGTDM Busyness</i>                             | $\rho = 0.77$ | <0.00001* |
| 33 | <i>GLCM Sum entropy</i>                           | $r = 0.81$    | <0.00001* |
| 68 | <i>GLRLM Run entropy</i>                          | $r = 0.77$    | <0.00001* |
| 43 | <i>GLDM Dependence entropy</i>                    | $r = 0.76$    | <0.00001* |
| 66 | <i>GLRLM Run percentage</i>                       | $r = 0.73$    | <0.00001* |
| 32 | <i>GLCM Autocorrelation</i>                       | $\rho = 0.76$ | <0.00001* |
| 70 | <i>GLRLM Run-length non-uniformity normalized</i> | $r = 0.72$    | <0.00001* |
| 11 | <i>First-order 90<sup>th</sup> percentile</i>     | $\rho = 0.75$ | <0.00001* |
| 39 | <i>GLCM Id</i>                                    | $\rho = 0.75$ | <0.00001* |
| 30 | <i>GLCM Idm</i>                                   | $\rho = 0.75$ | <0.00001* |
| 59 | <i>GLRLM Run variance</i>                         | $\rho = 0.75$ | <0.00001* |
| 42 | <i>GLDM High gray-level emphasis</i>              | $\rho = 0.75$ | <0.00001* |
| 61 | <i>GLRLM Long run emphasis</i>                    | $\rho = 0.74$ | <0.00001* |
| 69 | <i>GLRLM High gray-level run emphasis</i>         | $\rho = 0.74$ | <0.00001* |

|    |                                                       |               |           |
|----|-------------------------------------------------------|---------------|-----------|
| 19 | <i>GLCM Joint average</i>                             | $\rho = 0.74$ | <0.00001* |
| 64 | <i>GLRLM Short run emphasis</i>                       | $\rho = 0.74$ | <0.00001* |
| 34 | <i>GLCM Sum squares</i>                               | $\rho = 0.74$ | <0.00001* |
| 40 | <i>GLCM Cluster tendency</i>                          | $\rho = 0.73$ | <0.00001* |
| 49 | <i>GLDM Large dependence emphasis</i>                 | $\rho = 0.73$ | <0.00001* |
| 10 | <i>First-order Root mean squared</i>                  | $\rho = 0.73$ | <0.00001* |
| 18 | <i>First-order Mean</i>                               | $\rho = 0.73$ | <0.00001* |
| 62 | <i>GLRLM Short run high gray-level emphasis</i>       | $\rho = 0.73$ | <0.00001* |
| 75 | <i>GLSZM Size-zone non-uniformity</i>                 | $\rho = 0.73$ | <0.00001* |
| 41 | <i>GLDM Gray-level variance</i>                       | $\rho = 0.72$ | <0.00001* |
| 15 | <i>First-order Variance</i>                           | $\rho = 0.72$ | <0.00001* |
| 4  | <i>First-order Median</i>                             | $\rho = 0.70$ | <0.00001* |
| 38 | <i>GLCM Difference average</i>                        | $\rho = 0.70$ | <0.00001* |
| 26 | <i>GLCM Difference entropy</i>                        | $\rho = 0.70$ | <0.00001* |
| 56 | <i>GLRLM Gray-level variance</i>                      | $\rho = 0.69$ | <0.00001* |
| 47 | <i>GLDM Small dependence high gray-level emphasis</i> | $\rho = 0.69$ | <0.00001* |
| 46 | <i>GLDM Small dependence emphasis</i>                 | $\rho = 0.69$ | <0.00001* |
| 81 | <i>GLSZM Large area high gray-level emphasis</i>      | $\rho = 0.67$ | <0.00001* |



|    |                                                   |               |           |
|----|---------------------------------------------------|---------------|-----------|
| 65 | <i>GLRLM Long run high gray-level emphasis</i>    | $\rho = 0.67$ | <0.00001* |
| 35 | <i>GLCM Cluster prominence</i>                    | $\rho = 0.64$ | <0.00001* |
| 36 | <i>GLCM Imc2</i>                                  | $\rho = 0.64$ | <0.00001* |
| 79 | <i>GLSZM Zone percentage</i>                      | $\rho = 0.63$ | <0.00001* |
| 90 | <i>NGTDM Contrast</i>                             | $\rho = 0.63$ | <0.00001* |
| 82 | <i>GLSZM High gray-level zone emphasis</i>        | $\rho = 0.63$ | 0.00001*  |
| 23 | <i>GLCM Idmn</i>                                  | $\rho = 0.62$ | 0.00001*  |
| 84 | <i>GLSZM Low gray-level zone emphasis</i>         | $\rho = 0.62$ | 0.00001*  |
| 31 | <i>GLCM Correlation</i>                           | $\rho = 0.62$ | 0.00001*  |
| 22 | <i>GLCM Maximum probability</i>                   | $\rho = 0.61$ | 0.00001*  |
| 14 | <i>First-order Range</i>                          | $\rho = 0.61$ | 0.00001*  |
| 73 | <i>GLSZM Gray-level non-uniformity normalized</i> | $\rho = 0.60$ | 0.00001*  |
| 25 | <i>GLCM Contrast</i>                              | $\rho = 0.60$ | 0.00001*  |
| 83 | <i>GLSZM Small area emphasis</i>                  | $r = 0.59$    | 0.00002*  |
| 88 | <i>NGTDM Complexity</i>                           | $\rho = 0.60$ | 0.00002*  |
| 78 | <i>GLSZM Small area high gray-level emphasis</i>  | $\rho = 0.59$ | 0.00002*  |
| 28 | <i>GLCM Difference variance</i>                   | $\rho = 0.57$ | 0.00004*  |
| 21 | <i>GLCM Cluster shade</i>                         | $\rho = 0.57$ | 0.00005*  |

|    |                                                  |               |          |
|----|--------------------------------------------------|---------------|----------|
| 9  | <i>First-order Maximum</i>                       | $\rho = 0.57$ | 0.00005* |
| 71 | <i>GLSZM Gray-level variance</i>                 | $\rho = 0.54$ | 0.00013* |
| 51 | <i>GLDM Dependence variance</i>                  | $r = 0.53$    | 0.00014* |
| 48 | <i>GLDM Dependence non-uniformity normalized</i> | $\rho = 0.51$ | 0.00031* |
| 29 | <i>GLCM Idn</i>                                  | $\rho = 0.50$ | 0.00054* |
| 67 | GLRLM Long run low gray-level emphasis           | $\rho = 0.49$ | 0.00070  |
| 16 | First-order 10 <sup>th</sup> percentile          | $\rho = 0.48$ | 0.00079  |
| 57 | GLRLM Low gray-level run emphasis                | $\rho = 0.47$ | 0.00110  |
| 74 | GLSZM Size-zone non-uniformity normalized        | $\rho = 0.47$ | 0.00123  |
| 50 | GLDM Large dependence low gray-level emphasis    | $\rho = 0.46$ | 0.00153  |
| 55 | GLRLM Short run low gray-level emphasis          | $\rho = 0.44$ | 0.00220  |
| 37 | GLCM Imc1                                        | $r = 0.42$    | 0.00411  |
| 54 | GLDM Low gray-level emphasis                     | $\rho = 0.42$ | 0.00427  |
| 52 | GLDM Large dependence high gray-level emphasis   | $\rho = 0.41$ | 0.00547  |
| 89 | NGTDM Strength                                   | $\rho = 0.32$ | 0.03022  |
| 86 | GLSZM Small area low gray-level emphasis         | $\rho = 0.28$ | 0.06056  |
| 12 | First-order Minimum                              | $\rho = 0.18$ | 0.23732  |
| 17 | First-order Kurtosis                             | $\rho = 0.11$ | 0.47225  |

|    |                                               |                |         |
|----|-----------------------------------------------|----------------|---------|
| 27 | GLCM Inverse variance                         | $\rho = -0.09$ | 0.53565 |
| 53 | GLDM Small dependence low gray-level emphasis | $\rho = -0.07$ | 0.62542 |
| 2  | First-order Skewness                          | $\rho = 0.07$  | 0.62774 |

---

The radiomic features (Table rows) are arranged in order from the feature with the highest significant correlation, and this order corresponds to that in Fig. 3.

\*The *italicized radiomic features* had significant correlations (Pearson's product-moment correlation or Spearman's rank-order correlation,  $P < 0.00055$ : Bonferroni correction,  $\alpha = 0.05/91$ ) between ASL-nCBF and DSC-nrCBF.

ASL-nCBF, arterial spin labeling normalized cerebral blood flow; DSC-nrCBF, dynamic susceptibility contrast normalized relative cerebral blood flow; GLCM, gray-level co-occurrence matrix; GLDM, gray-level dependence matrix; GLRLM, gray-level run-length matrix; GLSZM, gray-level size-zone matrix; NGTDM, neighboring gray-tone difference matrix;  $r$ , Pearson's product-moment correlation coefficient;  $\rho$ , Spearman's rank-order correlation coefficient.

**Supplementary Text S1.** The scan parameters of the anatomical MR imaging ( $T_1$  FLAIR,  $T_2$  FLAIR,  $T_2$ WI,  $T_2^*$ WI, and CE- $T_1$ WI) and MR perfusion-weighted imaging (ASL and DSC imaging).

All patients underwent multi-parametric magnetic resonance (MR) imaging using a 3-T scanner (Discovery MR750 3.0T, GE Healthcare, Milwaukee, WI, USA) with a 32-channel head coil. In this study, the following 7 MR imaging sequences were acquired: 1)  $T_1$  fluid-attenuated inversion recovery (FLAIR) image, 2)  $T_2$  FLAIR image, 3)  $T_2$ -weighted image ( $T_2$ WI), 4)  $T_2^*$ -weighted image ( $T_2^*$ WI), 5) pseudo-continuous arterial spin labeling (ASL) imaging, 6) dynamic susceptibility contrast (DSC) imaging, and 7) contrast-enhanced  $T_1$ -weighted image (CE- $T_1$ WI). The main parameters of each sequence were set as follows:

1) Oblique-axial  $T_1$  FLAIR: repetition time (TR) = 2600 ms, echo time (TE) = 24 ms, inversion time (TI) = 1000 ms, flip angle (FA) =  $111^\circ$ , matrix size =  $352 \times 256$ , field of view (FOV) = 220 mm, slice thickness = 5 mm, slice spacing = 1 mm, band width (BW) =  $\pm 31.25$  kHz, number of slices = 24, scan time = 1 min 57 s.

2) Oblique-axial  $T_2$  FLAIR: TR = 8800 ms, TE = 140 ms, TI = 2041 ms, FA =  $111^\circ$ , matrix size =  $320 \times 224$ , FOV = 220 mm, slice thickness = 5 mm, slice spacing = 1 mm, BW =  $\pm 35.71$  kHz, number of slices = 24, scan time = 2 min 22 s.

3) Oblique-axial T<sub>2</sub>WI: TR = 5800 ms, TE = 96 ms, FA = 111°, matrix size = 512 × 320, FOV = 220 mm, slice thickness = 5 mm, slice spacing = 1 mm, BW = ± 41.67 kHz, number of slices = 24, scan time = 2 min 2 s.

4) Oblique-axial T<sub>2</sub>\*WI: TR = 770 ms, TE = 18 ms, FA = 20°, matrix size = 480 × 224, FOV = 220 mm, slice thickness = 5 mm, slice spacing = 1 mm, BW = ± 31.25 kHz, number of slices = 24, scan time = 2 min 55 s.

5) Axial ASL imaging, acquired using a three-dimensional pseudo-continuous ASL with spiral fast spin-echo sequence: PLD = 1525 ms, TR = 4642 ms, TE = 10.5 ms, FA = 111°, 512 sampling points on 8 spiral arms, in-plane matrix = 128 × 128, FOV = 240 mm, slice thickness = 4 mm, BW = ± 62.5 kHz, number of slices = 37, scan time = 2 min 1 s.

6) Oblique-axial DSC imaging, acquired using a gradient-echo echo-planar imaging sequence after a bolus injection of 0.1 ml/kg of gadoterate meglumine (MAGNESCOPE, Guerbet, Tokyo, Japan) at a rate of 3 ml/s, followed by a 30 ml bolus of saline flush at the same rate: TR = 2000 ms, TE = 13.3 ms, FA = 60°, matrix size = 96 × 128, FOV = 220 mm, slice thickness = 5 mm, slice spacing = 1 mm, BW = ± 250 kHz, number of slices = 22, scan time = 1 min 20 s. Before DSC imaging, a bolus injection of 0.1 ml/kg of gadoterate

meglumine was used for dynamic contrast-enhanced imaging (preload leakage correction to minimize  $T_1$  effects for DSC imaging).

7) Oblique-axial CE- $T_1$ WI, acquired using a three-dimensional spoiled gradient-echo sequence after DSC imaging: TR = 8.8 ms, TE = 2.8 ms, FA =  $15^\circ$ , matrix size =  $512 \times 320$ , FOV = 240 mm, slice thickness = 0.9 mm, BW =  $\pm 41.67$  kHz, number of slices = 210, scan time = 4 min 57 s.

The oblique-axial planes of  $T_1$  FLAIR,  $T_2$  FLAIR,  $T_2$ WI,  $T_2^*$ WI, DSC imaging, and CE- $T_1$ WI were set to align along the anterior commissure–posterior commissure line of each patient.
